# Supplementary material
Source: MDPI journal article supplement (https://www.mdpi.com/2410-3888/6/4/50)
Supplement: s1 [file s1]

Supplementary Materials

# Nondestructive Monitoring of Soft Bottom Fish and Habitats Using a Standardized, Remote and Unbaited 360° Video Sampling Method

Delphine Mallet <sup>1,\*</sup>, Marion Olivry <sup>2</sup>, Sophia Ighiouer <sup>3</sup>, Michel Kulbicki <sup>4</sup> and Laurent Wantiez <sup>5</sup>

<sup>1</sup> VISIOON, 6 Rue du Docteur Fruitet, 98800 Nouméa, New Caledonia; d.mallet@visioon.nc

<sup>2</sup> CNAM Intechmer, Boulevard de Collignon, 50110 Tourlaville, France; marionolivry4@gmail.com

<sup>3</sup> École Pratique des Hautes Études (PSL University), Les Patios Saint-Jacques, 4–14 Rue Ferrus, 75014 Paris, France; sophia.ighiouer@hotmail.fr

<sup>4</sup> Institut de Recherche pour le Développement (IRD), UMR Entropie, Université de Perpignan, 66000 Perpignan, France; michel.kulbicki@ird.fr

<sup>5</sup> Université de la Nouvelle-Calédonie (UNC), UMR Entropie, LabEX CORAIL, BP R4, CEDEX, 98851 Nouméa, New Caledonia

\* Correspondence: laurent.wantiez@unc.nc

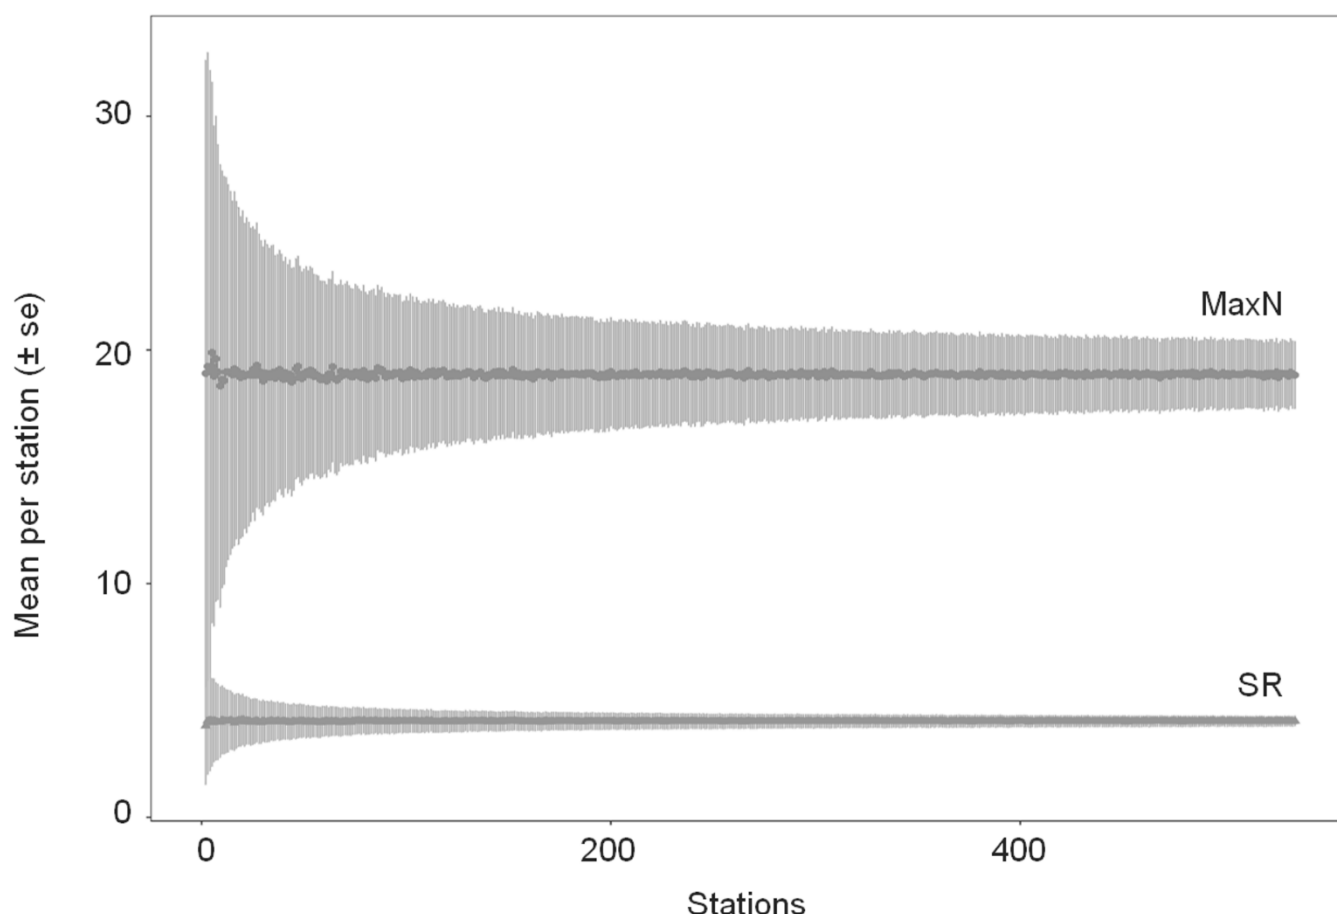

**Figure S1.** Mean cumulated number ( $\pm$  SE) of species and fish per station depending of the number of stations sampled. “MaxN”: Abundance of fish; “SR”: species richness.

| Legend :                             |                        |       |          |        |           |        |           |        |           |        |
|--------------------------------------|------------------------|-------|----------|--------|-----------|--------|-----------|--------|-----------|--------|
|                                      |                        |       |          |        |           |        |           |        |           |        |
| 0 < 20%                              |                        |       |          |        |           |        |           |        |           |        |
| 20% < 40%                            |                        |       |          |        |           |        |           |        |           |        |
| 40% < 60%                            |                        |       |          |        |           |        |           |        |           |        |
| 60% < 80%                            |                        |       |          |        |           |        |           |        |           |        |
| 80% < 100%                           |                        |       |          |        |           |        |           |        |           |        |
| Number of stations / km <sup>2</sup> | All soft bottoms       |       |          |        |           |        |           |        |           |        |
|                                      | 2 min 30               | 5 min | 7 min 30 | 10 min | 12 min 30 | 15 min | 17 min 30 | 20 min | 22 min 30 | 25 min |
| 9                                    | 62                     | 69    | 74       | 78     | 80        | 83     | 85        | 87     | 87        | 88     |
| 8                                    | 60                     | 68    | 73       | 75     | 78        | 81     | 83        | 85     | 85        | 86     |
| 7                                    | 57                     | 65    | 70       | 72     | 75        | 77     | 80        | 82     | 83        | 83     |
| 6                                    | 55                     | 64    | 67       | 69     | 72        | 74     | 77        | 78     | 79        | 80     |
| 5                                    | 51                     | 59    | 63       | 65     | 68        | 70     | 73        | 75     | 75        | 76     |
| 4                                    | 47                     | 54    | 58       | 61     | 63        | 66     | 68        | 70     | 70        | 71     |
| 3                                    | 43                     | 49    | 53       | 54     | 57        | 59     | 62        | 63     | 64        | 65     |
| 2                                    | 35                     | 42    | 45       | 47     | 49        | 51     | 53        | 54     | 55        | 56     |
| 1                                    | 25                     | 30    | 33       | 34     | 36        | 38     | 39        | 41     | 42        | 42     |
| Number of stations / km <sup>2</sup> | Mixed soft bottoms     |       |          |        |           |        |           |        |           |        |
|                                      | 2 min 30               | 5 min | 7 min 30 | 10 min | 12 min 30 | 15 min | 17 min 30 | 20 min | 22 min 30 | 25 min |
| 9                                    | 51                     | 61    | 64       | 67     | 69        | 71     | 74        | 76     | 79        | 79     |
| 8                                    | 49                     | 59    | 61       | 64     | 66        | 69     | 71        | 74     | 76        | 76     |
| 7                                    | 46                     | 56    | 59       | 61     | 63        | 66     | 69        | 71     | 72        | 72     |
| 6                                    | 44                     | 52    | 55       | 58     | 59        | 61     | 64        | 66     | 68        | 68     |
| 5                                    | 41                     | 49    | 51       | 54     | 55        | 57     | 60        | 62     | 64        | 64     |
| 4                                    | 37                     | 45    | 47       | 49     | 51        | 53     | 55        | 56     | 58        | 59     |
| 3                                    | 32                     | 39    | 41       | 44     | 44        | 46     | 48        | 49     | 51        | 51     |
| 2                                    | 26                     | 32    | 34       | 36     | 37        | 39     | 40        | 41     | 42        | 42     |
| 1                                    | 18                     | 21    | 22       | 24     | 24        | 25     | 26        | 27     | 28        | 28     |
| Number of stations / km <sup>2</sup> | Vegetated soft bottoms |       |          |        |           |        |           |        |           |        |
|                                      | 2 min 30               | 5 min | 7 min 30 | 10 min | 12 min 30 | 15 min | 17 min 30 | 20 min | 22 min 30 | 25 min |
| 9                                    | 59                     | 67    | 72       | 73     | 77        | 81     | 83        | 85     | 85        | 85     |
| 8                                    | 57                     | 65    | 69       | 71     | 75        | 79     | 80        | 82     | 82        | 82     |
| 7                                    | 54                     | 62    | 66       | 67     | 71        | 75     | 77        | 79     | 79        | 79     |
| 6                                    | 51                     | 59    | 63       | 64     | 68        | 71     | 73        | 75     | 75        | 75     |
| 5                                    | 48                     | 55    | 59       | 60     | 63        | 67     | 69        | 71     | 71        | 71     |
| 4                                    | 44                     | 50    | 54       | 55     | 59        | 61     | 63        | 65     | 65        | 65     |
| 3                                    | 39                     | 45    | 48       | 49     | 53        | 55     | 57        | 58     | 59        | 59     |
| 2                                    | 31                     | 37    | 40       | 42     | 44        | 46     | 47        | 49     | 49        | 50     |
| 1                                    | 22                     | 25    | 28       | 30     | 31        | 33     | 34        | 35     | 36        | 37     |
| Number of stations / km <sup>2</sup> | Bare soft bottoms      |       |          |        |           |        |           |        |           |        |
|                                      | 2 min 30               | 5 min | 7 min 30 | 10 min | 12 min 30 | 15 min | 17 min 30 | 20 min | 22 min 30 | 25 min |
| 9                                    | 35                     | 46    | 52       | 52     | 57        | 62     | 67        | 67     | 69        | 70     |
| 8                                    | 33                     | 44    | 50       | 50     | 55        | 59     | 63        | 64     | 66        | 67     |
| 7                                    | 32                     | 41    | 47       | 48     | 51        | 55     | 60        | 60     | 62        | 63     |
| 6                                    | 29                     | 38    | 43       | 44     | 48        | 52     | 55        | 56     | 57        | 59     |
| 5                                    | 27                     | 34    | 39       | 40     | 44        | 47     | 51        | 52     | 53        | 54     |
| 4                                    | 23                     | 30    | 35       | 36     | 39        | 42     | 45        | 46     | 48        | 49     |
| 3                                    | 19                     | 26    | 30       | 30     | 33        | 35     | 39        | 40     | 41        | 42     |
| 2                                    | 15                     | 19    | 23       | 24     | 26        | 28     | 30        | 31     | 33        | 33     |
| 1                                    | 9                      | 12    | 14       | 15     | 17        | 18     | 19        | 20     | 21        | 21     |

**Figure S2.** Proportion of the theoretical SR-station depending on the duration and the number of video recorded within Table . he studied area for all soft bottoms and by habitats. See legend for colors.

**Table S1.** List of families and species of fish sampled in the study area. freq: frequency of occurrence; H1: primary habitat; H2: secondary habitat; S: soft bottom; H: hard-bottom; S / H: soft bottom and/or hard-bottom; C: Commercial fish; o (Wantiez com pers).

| Family (freq - MaxN) - species      |                       | H1  | H2 | C |
|-------------------------------------|-----------------------|-----|----|---|
| <b>Acanthuridae (9.9% - 281)</b>    |                       |     |    |   |
| <i>Acanthurus</i>                   | <i>albipectoralis</i> | H   | -  | - |
| <i>Acanthurus</i>                   | <i>blochii</i>        | H   | S  | o |
| <i>Acanthurus</i>                   | <i>olivaceus</i>      | H   | S  | o |
| <i>Acanthurus</i>                   | <i>sp</i>             | -   | -  | o |
| <i>Acanthurus</i>                   | <i>xanthopterus</i>   | H   | S  | o |
| <i>Naso</i>                         | <i>annulatus</i>      | H   | -  | o |
| <i>Naso</i>                         | <i>brevirostris</i>   | H   | -  | o |
| <i>Naso</i>                         | <i>sp</i>             | -   | -  | o |
| <i>Naso</i>                         | <i>tonganus</i>       | H   | -  | o |
| <i>Naso</i>                         | <i>unicornis</i>      | H   | S  | o |
| <i>Unidentified</i>                 |                       | -   | -  | o |
| <b>Balistidae (18.5% - 128)</b>     |                       |     |    |   |
| <i>Abalistes</i>                    | <i>stellatus</i>      | S   | -  | - |
| <i>Pseudobalistes</i>               | <i>fuscus</i>         | S/H | -  | - |
| <i>Rhinecanthus</i>                 | <i>aculeatus</i>      | H   | S  | - |
| <i>Sufflamen</i>                    | <i>chrysopterus</i>   | S/H | -  | - |
| <i>Sufflamen</i>                    | <i>fraenatum</i>      | S/H | -  | - |
| <i>Sufflamen</i>                    | <i>sp</i>             | -   | -  | - |
| <i>Unidentified</i>                 |                       | -   | -  | - |
| <b>Caesionidae (1.1% - 174)</b>     |                       |     |    |   |
| <i>Unidentified</i>                 |                       | -   | -  | - |
| <b>Carangidae (10.9% - 507)</b>     |                       |     |    |   |
| <i>Atule</i>                        | <i>mate</i>           | S/H | -  | o |
| <i>Carangoides</i>                  | <i>chrysophrys</i>    | S/H | -  | o |
| <i>Carangoides</i>                  | <i>ferdau</i>         | S/H | -  | o |
| <i>Carangoides</i>                  | <i>gymnostethus</i>   | S/H | -  | o |
| <i>Carangoides</i>                  | <i>orthogrammus</i>   | S/H | -  | o |
| <i>Caranx</i>                       | <i>papuensis</i>      | S/H | -  | o |
| <i>Gnathanodon</i>                  | <i>speciosus</i>      | S/H | -  | o |
| <i>Seriola</i>                      | <i>sp</i>             | S/H | -  | o |
| <i>Trachinotus</i>                  | <i>sp</i>             | S/H | -  | o |
| <i>Unidentified</i>                 |                       | S/H | -  | o |
| <b>Carcharhinidae (3.6% - 19)</b>   |                       |     |    |   |
| <i>Carcharhinus</i>                 | <i>plumbeus</i>       | S/H | -  | - |
| <i>Galeocerdo</i>                   | <i>cuvier</i>         | S/H | -  | - |
| <i>Negaprion</i>                    | <i>acutidens</i>      | S/H | -  | - |
| <b>Chaetodontidae (12.5% - 186)</b> |                       |     |    |   |
| <i>Chaetodon</i>                    | <i>Auriga</i>         | H   | -  | - |
| <i>Chaetodon</i>                    | <i>bennetti</i>       | H   | -  | - |
| <i>Chaetodon</i>                    | <i>flavivirostris</i> | H   | -  | - |
| <i>Chaetodon</i>                    | <i>Kleinii</i>        | H   | -  | - |
| <i>Chaetodon</i>                    | <i>lineolatus</i>     | H   | -  | - |
| <i>Chaetodon</i>                    | <i>lunulatus</i>      | H   | -  | - |
| <i>Chaetodon</i>                    | <i>mertensii</i>      | H   | -  | - |
| <i>Chaetodon</i>                    | <i>pelewensis</i>     | H   | -  | - |
| <i>Chaetodon</i>                    | <i>plebeius</i>       | H   | -  | - |
| <i>Chaetodon</i>                    | <i>sp</i>             | H   | -  | - |
| <i>Chaetodon</i>                    | <i>unimaculatus</i>   | H   | -  | - |
| <i>Heniochus</i>                    | <i>acuminatus</i>     | H   | -  | - |
| <i>Heniochus</i>                    | <i>monoceros</i>      | H   | -  | - |
| <b>Chanidae (0.9% - 58)</b>         |                       |     |    |   |
| <i>Chanos</i>                       | <i>chanos</i>         | S/H | -  | o |
| <b>Dasyatidae (7.5% - 44)</b>       |                       |     |    |   |
| <i>Himantura</i>                    | <i>fai</i>            | S/H | -  | - |

|                       |                                    |     |   |   |
|-----------------------|------------------------------------|-----|---|---|
| <i>Neotrygon</i>      | <i>kuhlii</i>                      | S/H | - | - |
| <i>Pastinachus</i>    | <i>sephen</i>                      | S/H | - | - |
| <i>Unidentified</i>   |                                    | S/H | - | - |
|                       | Diodontidae (1.1%% - 6)            |     |   |   |
| <i>Diodon</i>         | <i>hystrix</i>                     | H   | - | - |
|                       | Echeneidae (9.2%% - 63)            |     |   |   |
| <i>Echeneis</i>       | <i>naucratus</i>                   | S/H | - | - |
|                       | Ginglymostomatidae (0.6% - 3)      |     |   |   |
| <i>Nebrius</i>        | <i>ferrugineus</i>                 | S/H | - | - |
|                       | Gobiidae et Blenniidae (5.4% - 40) |     |   |   |
| <i>Unidentified</i>   | <i>sp</i>                          | -   | - | - |
|                       | Haemulidae (8.2% - 125)            |     |   |   |
| <i>Diagramma</i>      | <i>picta</i>                       | H   | S | 0 |
| <i>Plectorhinchus</i> | <i>gibbosus</i>                    | H   | - | - |
| <i>Unidentified</i>   |                                    | -   | - | - |
|                       | Hemiramphidae (0.6% - 31)          |     |   |   |
| <i>Hemiramphus</i>    | <i>far</i>                         | S/H | - | - |
| <i>Unidentified</i>   |                                    | -   | - | - |
|                       | Labridae (26.4% - 1175)            |     |   |   |
| <i>Bodianus</i>       | <i>loxozoneus</i>                  | H   | - | - |
| <i>Bodianus</i>       | <i>perditio</i>                    | H   | S | 0 |
| <i>Cheilinus</i>      | <i>chlorourus</i>                  | H   | - | - |
| <i>Cheilinus</i>      | <i>fasciatus</i>                   | H   | - | - |
| <i>Choerodon</i>      | <i>graphicus</i>                   | H   | S | - |
| <i>Coris</i>          | <i>batuensis</i>                   | H   | S | - |
| <i>Coris</i>          | <i>dorsomaculata</i>               | H   | - | - |
| <i>Coris</i>          | <i>gaimard</i>                     | H   | - | - |
| <i>Halichoeres</i>    | <i>trimaculatus</i>                | H   | S | - |
| <i>Hemigymnus</i>     | <i>melapterus</i>                  | H   | - | - |
| <i>Labroides</i>      | <i>dimidiatus</i>                  | H   | - | - |
| <i>Oxycheilinus</i>   | <i>bimaculatus</i>                 | S/H | S | - |
| <i>Oxycheilinus</i>   | <i>sp</i>                          | -   | - | - |
| <i>Oxycheilinus</i>   | <i>unifasciatus</i>                | H   | - | - |
| <i>Suezichthys</i>    | <i>devisi</i>                      | S/H | S | - |
| <i>Thalassoma</i>     | <i>amblycephalum</i>               | H   | - | - |
| <i>Thalassoma</i>     | <i>lunare</i>                      | H   | - | - |
| <i>Thalassoma</i>     | <i>lutescens</i>                   | H   | - | - |
| <i>Thalassoma</i>     | <i>nigrofasciatum</i>              | H   | - | - |
| <i>Unidentified</i>   |                                    | -   | - | - |
|                       | Lethrinidae (33% - 992)            |     |   |   |
| <i>Gymnocranius</i>   | <i>sp</i>                          | S/H | - | 0 |
| <i>Lethrinus</i>      | <i>atkinsoni</i>                   | S/H | - | 0 |
| <i>Lethrinus</i>      | <i>gp</i>                          | S/H | - | 0 |
| <i>Lethrinus</i>      | <i>harak</i>                       | H   | - | 0 |
| <i>Lethrinus</i>      | <i>nebulosus</i>                   | S/H | - | 0 |
| <i>Lethrinus</i>      | <i>rubrioperculatus</i>            | S   | - | 0 |
| <i>Monotaxis</i>      | <i>grandoculis</i>                 | S/H | S | - |
| <i>Unidentified</i>   |                                    | -   | - | 0 |
|                       | Lutjanidae (6.4% - 168)            |     |   |   |
| <i>Aprion</i>         | <i>virescens</i>                   | S/H | S | 0 |
| <i>Lutjanus</i>       | <i>adetii</i>                      | S/H | S | 0 |
| <i>Lutjanus</i>       | <i>bohar</i>                       | H   | - | - |
| <i>Lutjanus</i>       | <i>fulvus</i>                      | H   | - | - |
| <i>Lutjanus</i>       | <i>sp</i>                          | -   | - | - |
| <i>Lutjanus</i>       | <i>vitta</i>                       | S/H | S | 0 |
| <i>Symphorus</i>      | <i>nematophorus</i>                | S/H | S | - |
|                       | Microdesmidae (0.2% - 1)           |     |   |   |
| <i>Unidentified</i>   |                                    | -   | - | - |
|                       | Monacanthidae (6.9% - 54)          |     |   |   |
| <i>Aluterus</i>       | <i>scriptus</i>                    | H   | - | - |

|                        |                              |     |   |   |
|------------------------|------------------------------|-----|---|---|
| <i>Paramonacanthus</i> | <i>japonicus</i>             | S   | - | - |
| <i>Pseudalutarius</i>  | <i>nasicornis</i>            | S   | - | - |
| <i>Unidentified</i>    |                              | S/H | - | - |
|                        | Mullidae (25.8% - 811)       |     |   |   |
| <i>Mulloidichthys</i>  | <i>flavolineatus</i>         | H   | - | - |
| <i>Parupeneus</i>      | <i>barberinoides</i>         | H   | S | - |
| <i>Parupeneus</i>      | <i>barberinus</i>            | H   | S | 0 |
| <i>Parupeneus</i>      | <i>heptacanthus</i>          | H   | S | - |
| <i>Parupeneus</i>      | <i>indicus</i>               | H   | S | - |
| <i>Parupeneus</i>      | <i>multifasciatus</i>        | H   | S | - |
| <i>Parupeneus</i>      | <i>pleurostigma</i>          | H   | S | - |
| <i>Parupeneus</i>      | <i>sp</i>                    | -   | - | - |
| <i>Parupeneus</i>      | <i>spilurus</i>              | H   | S | - |
| <i>Upeneus</i>         | <i>sundaicus</i>             | S/H | S | - |
| <i>Upeneus</i>         | <i>tragula</i>               | S/H | S | - |
| <i>Unidentified</i>    |                              | -   | - | - |
|                        | Myliobatidae (2.1% - 19)     |     |   |   |
| <i>Aetobatus</i>       | <i>narinari</i>              | S/H | - | - |
|                        | Nemipteridae (6.2% - 149)    |     |   |   |
| <i>Nemipterus</i>      | <i>gp</i>                    | -   | - | 0 |
| <i>Pentapodus</i>      | <i>aureofasciatus</i>        | H   | - | - |
| <i>Scolopsis</i>       | <i>bilineata</i>             | H   | S | - |
| <i>Scolopsis</i>       | <i>trilineata</i>            | S/H | S | - |
|                        | Ostraciidae (2.2% - 12)      |     |   |   |
| <i>Ostracion</i>       | <i>cubicus</i>               | H   | - | - |
| <i>Ostracion</i>       | <i>solorensis</i>            | H   | - | - |
| <i>Ostracion</i>       | <i>sp</i>                    | -   | - | - |
| <i>Tetrosomus</i>      | <i>gibbosus</i>              | S   | S | - |
|                        | Pinguipedidae (2.4% - 17)    |     |   |   |
| <i>Parapercis</i>      | <i>sp</i>                    | -   | - | - |
|                        | Pomacanthidae (7.5% - 80)    |     |   |   |
| <i>Centropyge</i>      | <i>bicolor</i>               | H   | - | - |
| <i>Centropyge</i>      | <i>tibicen</i>               | H   | - | - |
| <i>Pomacanthus</i>     | <i>sexstriatus</i>           | H   | - | - |
|                        | Pomacentridae (26.8% - 3390) |     |   |   |
| <i>Amphiprion</i>      | <i>gp</i>                    | H   | - | - |
| <i>Chromis</i>         | <i>sp</i>                    | H   | - | - |
| <i>Chrysiptera</i>     | <i>biocellata</i>            | H   | - | - |
| <i>Dascyllus</i>       | <i>aruanus</i>               | H   | - | - |
| <i>Dascyllus</i>       | <i>reticulatus</i>           | H   | - | - |
| <i>Dascyllus</i>       | <i>trimaculatus</i>          | H   | - | - |
| <i>Pomacentrus</i>     | <i>coelestis</i>             | H   | - | - |
| <i>Pomacentrus</i>     | <i>gp</i>                    | H   | - | - |
| <i>Pomacentrus</i>     | <i>nagasakiensis</i>         | H   | - | - |
| <i>Pomacentrus</i>     | <i>sp</i>                    | H   | - | - |
| <i>Stegastes</i>       | <i>nigricans</i>             | H   | - | - |
| <i>Unidentified</i>    |                              | H   | - | - |
|                        | Ptereleotridae (6.2% - 261)  |     |   |   |
| <i>Ptereleotris</i>    | <i>sp</i>                    | S/H | S | - |
|                        | Scaridae (14% - 769)         |     |   |   |
| <i>Chlorurus</i>       | <i>sordidus</i>              | H   | S | 0 |
| <i>Hipposcarus</i>     | <i>longiceps</i>             | H   | S | 0 |
| <i>Scarus</i>          | <i>chameleon</i>             | H   | S | 0 |
| <i>Scarus</i>          | <i>ghobban</i>               | H   | S | 0 |
| <i>Scarus</i>          | <i>psittacus</i>             | H   | S | 0 |
| <i>Scarus</i>          | <i>rivulatus</i>             | H   | S | 0 |
| <i>Scarus</i>          | <i>schlegeli</i>             | H   | S | 0 |
| <i>Unidentified</i>    |                              | H   | S | 0 |
|                        | Scombridae (2.2% - 12)       |     |   |   |
| <i>Scomberomorus</i>   | <i>commerson</i>             | S/H | - | 0 |

|                                |                          |     |   |   |
|--------------------------------|--------------------------|-----|---|---|
| Serranidae (7.3% - 71)         |                          |     |   |   |
| <i>Cephalopholis</i>           | <i>sp</i>                | H   | - | 0 |
| <i>Epinephelus</i>             | <i>cyanopodus</i>        | H   | S | 0 |
| <i>Epinephelus</i>             | <i>maculatus</i>         | H   | S | 0 |
| <i>Epinephelus</i>             | <i>malabaricus</i>       | H   | - | 0 |
| <i>Epinephelus</i>             | <i>sp</i>                | -   | - | - |
| <i>Plectropomus</i>            | <i>laevis</i>            | H   | S | - |
| <i>Plectropomus</i>            | <i>leopardus</i>         | H   | S | 0 |
| <i>Plectropomus</i>            | <i>sp</i>                | -   | - | - |
| <i>Unidentified</i>            |                          | -   | - | - |
| Siganidae (4.3% - 322)         |                          |     |   |   |
| <i>Siganus</i>                 | <i>argenteus</i>         | S/H | - | 0 |
| <i>Siganus</i>                 | <i>puellus</i>           | H   | - | 0 |
| <i>Siganus</i>                 | <i>punctatus</i>         | H   | - | 0 |
| <i>Siganus</i>                 | <i>sp</i>                | -   | - | 0 |
| <i>Siganus</i>                 | <i>spinus</i>            | H   | - | 0 |
| <i>Siganus</i>                 | <i>woodlandi</i>         | S/H | - | 0 |
| Sphyraenidae (0.6% - 3)        |                          |     |   |   |
| <i>Sphyraena</i>               | <i>barracuda</i>         | S/H | - | - |
| Stegostomatidae (0.2% - 1)     |                          |     |   |   |
| <i>Stegostoma</i>              | <i>fasciatum</i>         | S/H | - | - |
| Tetraodontidae (4.1% - 22)     |                          |     |   |   |
| <i>Arothron</i>                | <i>caeruleopunctatus</i> | H   | - | - |
| <i>Arothron</i>                | <i>hispidus</i>          | H   | S | - |
| <i>Arothron</i>                | <i>sp</i>                | -   | - | - |
| <i>Arothron</i>                | <i>stellatus</i>         | H   | S | - |
| <i>Canthigaster</i>            | <i>valentini</i>         | H   | - | - |
| <i>Lagocephalus</i>            | <i>scleratus</i>         | S   | - | - |
| <i>Unidentified</i>            |                          | -   | - | - |
| Unidentified shark (2.1% - 11) |                          | S/H | - | - |
| Zanclidae (0.4% - 2)           |                          |     |   |   |
| <i>Zanclus</i>                 | <i>cornutus</i>          | H   | - | - |
